# Supplementary material for: SMARTIV: combined sequence and structure de-novo motif discovery for in-vivo RNA binding data
Source: PubMed Central journal article supplement — Nucleic Acids Res. 2018 May 25;46(Web Server issue):W221–8. doi: 10.1093/nar/gky453 (PMC6030986; doi:10.1093/nar/gky453), 2018-05-25
Supplement: gky453_supplemental_files.pdf [file gky453_supplemental_files.pdf]

Supplementary Table S1

| Protein                                     | Source | Motif 1                                                                             | p-value L   | Motif 2                                                                             | p-value L   | Motif 3                                                                               | p-value L  | <i>In vivo</i> Motif *                                                                | Structure Info** |
|---------------------------------------------|--------|-------------------------------------------------------------------------------------|-------------|-------------------------------------------------------------------------------------|-------------|---------------------------------------------------------------------------------------|------------|---------------------------------------------------------------------------------------|------------------|
| <b>EIG4G2</b><br>eCLIP<br>K562-01<br>h38    | ENCODE |    | 2.00e-308 7 |    | 2.75e-308 5 |    | 1E-282 6   |                                                                                       |                  |
| <b>ELAV1</b><br>PARCLIP<br>HEK293<br>h19    | doRiNa |    | 6.78E-08 7  |                                                                                     |             |                                                                                       |            |    | single stranded  |
| <b>EWSR1</b><br>PARCLIP<br>HEK293-01<br>h19 | CLIPdb |    | 8.78E-30 7  |    | 2.34E-23 5  |    | 2.69E-19 6 |                                                                                       |                  |
| <b>EWSR1</b><br>eCLIP<br>K562-02<br>h38     | ENCODE |    | 3.64E-166 6 |    | 4.3E-135 7  |    | 3.3E-128 5 |                                                                                       |                  |
| <b>FIP1L1</b><br>PARCLIP<br>HEK293<br>h19   | CLIPdb |    | 5.35E-74 4  |    | 1.57E-63 5  |    | 4.5E-49 6  |                                                                                       |                  |
| <b>FMR1</b><br>PARCLIP<br>HEK293<br>h19     | doRiNa |  | 2E-213 6    |  | 1.4E-174 4  |  | 2.6E-151 5 |  |                  |
| <b>FUBP3</b><br>eCLIP<br>K562-01<br>h38     | ENCODE |  | 9.4E-133 6  |  | 1.3E-102 5  |  | 1.12E-96 7 |                                                                                       |                  |
| <b>FUS</b><br>PARCLIP<br>HEK293<br>h19      | CLIPdb |  | 1.24E-53 7  |  | 1.92E-41 6  |  | 7.43E-38 5 |  | SELEX            |

|                                           |        |                                                                                     |           |   |                                                                                     |           |   |                                                                                       |           |   |                                                                                      |
|-------------------------------------------|--------|-------------------------------------------------------------------------------------|-----------|---|-------------------------------------------------------------------------------------|-----------|---|---------------------------------------------------------------------------------------|-----------|---|--------------------------------------------------------------------------------------|
| <b>hnRNPA1</b><br>eCLIP<br>K562-02<br>h38 | ENCODE |    | 3.54E-56  | 5 |    | 3.23E-53  | 7 |    | 9.56E-51  | 6 |   |
| <b>hnRNPC</b><br>iCLIP<br>HeLA<br>h19     | doRiNa |    | 3.6E-06   | 7 |    | 3.86E-06  | 5 |    |           |   |   |
| <b>hnRNPC</b><br>eCLIP<br>HepG2-01<br>h38 | ENCODE |    | 1.1E-232  | 6 |    | 9.5E-153  | 5 |    | 1.57E-43  | 4 |   |
| <b>hnRNPK</b><br>eCLIP<br>HepG2-01<br>h38 | ENCODE |    | 2.00e-308 | 5 |    | 2.00e-308 | 6 |    | 2.00e-308 | 7 |   |
| <b>hnRNPK</b><br>eCLIP<br>K562-02<br>h38  | ENCODE |    | 2.9E-156  | 7 |    | 2.9E-146  | 6 |    | 2.1E-113  | 5 |   |
| <b>hnRNPL</b><br>eCLIP<br>HepG2-01<br>h38 | ENCODE |    | 2.00e-308 | 5 |    | 2.00e-308 | 6 |    | 2.00e-308 | 7 |   |
| <b>hnRNPL</b><br>eCLIP<br>K562-01<br>h38  | ENCODE |   | 2.00e-308 | 5 |   | 2.00e-308 | 6 |   | 2.00e-308 | 7 |  |
| <b>hnRNPM</b><br>eCLIP<br>HepG2-01<br>h38 | ENCODE |  | 3.73E-96  | 5 |  | 4.49E-93  | 6 |  | 4.33E-46  | 7 |                                                                                      |
| <b>hnRNPM</b><br>eCLIP<br>K562-01<br>h38  | ENCODE |  | 3.37E-68  | 5 |  | 3.8E-56   | 7 |  | 8.32E-39  | 6 |                                                                                      |
| <b>hnRNPU</b><br>eCLIP<br>HepG2-01<br>h38 | ENCODE |  | 2.01E-54  | 5 |  | 1.22E-50  | 6 |  | 5.31E-47  | 7 |                                                                                      |

|                                            |        |  |           |   |  |           |   |  |           |   |  |
|--------------------------------------------|--------|--|-----------|---|--|-----------|---|--|-----------|---|--|
| <b>hnRNPU</b><br>eCLIP<br>K562-01<br>h38   | ENCODE |  | 1E-127    | 5 |  | 2.2E-115  | 6 |  | 4.3E-115  | 7 |  |
| <b>IGF2BP1</b><br>PARCLIP<br>HEK293<br>h19 | CLIPdb |  | 5.42E-59  | 7 |  | 6.14E-44  | 5 |  | 3.58E-29  | 6 |  |
| <b>IGF2BP1</b><br>eCLIP<br>K562-01<br>h38  | ENCODE |  | 2.13E-67  | 5 |  | 6.81E-53  | 7 |  | 2.33E-42  | 6 |  |
| <b>IGF2BP2</b><br>PARCLIP<br>HEK293<br>h19 | CLIPdb |  | 1.78E-95  | 6 |  | 4.33E-87  | 7 |  | 2.39E-58  | 5 |  |
| <b>IGF2BP2</b><br>eCLIP<br>K562-02<br>h38  | ENCODE |  | 4.4E-138  | 7 |  | 1.4E-133  | 5 |  | 5E-129    | 6 |  |
| <b>IGF2BP3</b><br>PARCLIP<br>HEK293<br>h19 | CLIPdb |  | 2.94E-97  | 7 |  | 9.36E-97  | 6 |  | 6.28E-96  | 5 |  |
| <b>IGF2BP3</b><br>eCLIP<br>HepG2-02<br>h38 | ENCODE |  | 1.5E-142  | 7 |  | 3.7E-126  | 6 |  | 3.9E-119  | 5 |  |
| <b>KHDRBS1</b><br>eCLIP<br>K562-01<br>h38  | ENCODE |  | 2.00e-308 | 7 |  | 7.2E-305  | 6 |  | 1E-296    | 5 |  |
| <b>KHSRP</b><br>eCLIP<br>K562-01<br>h38    | ENCODE |  | 2.5E-145  | 6 |  | 9.1E-115  | 5 |  | 3.3E-100  | 7 |  |
| <b>PCBP2</b><br>eCLIP<br>HepG2-02<br>h38   | ENCODE |  | 2.00e-308 | 5 |  | 2.00e-308 | 7 |  | 2.00e-308 | 6 |  |



|                                            |        |                                                                                     |           |   |                                                                                     |           |   |                                                                                       |           |   |                                                                                       |                    |
|--------------------------------------------|--------|-------------------------------------------------------------------------------------|-----------|---|-------------------------------------------------------------------------------------|-----------|---|---------------------------------------------------------------------------------------|-----------|---|---------------------------------------------------------------------------------------|--------------------|
| <b>PTB1</b><br>eCLIP<br>HepG2-01<br>h38    | ENCODE |    | 2.00e-308 | 5 |    | 2.00e-308 | 7 |    | 2.00e-308 | 6 |    | single<br>stranded |
| <b>PTB1</b><br>eCLIP<br>K562-01<br>h38     | ENCODE |    | 2.00e-308 | 5 |    | 2.00e-308 | 7 |    | 2.00e-308 | 6 |    | single<br>stranded |
| <b>PUM2</b><br>PARCLIP<br>HEK293<br>h19    | doRiNa |    | 1.09E-22  | 6 |    | 6.39E-19  | 5 |    | 1E-16     | 7 |    |                    |
| <b>PUM2</b><br>eCLIP<br>K562-02<br>h38     | ENCODE |    | 1E-261    | 7 |    | 1.4E-210  | 6 |    | 1.1E-205  | 5 |    |                    |
| <b>QKI</b><br>PARCLIP<br>HEK293<br>h19     | ENCODE |    | 2.00e-308 | 5 |    | 3.1E-289  | 6 |    | 1.2E-267  | 7 |    | single<br>stranded |
| <b>QKI</b><br>eCLIP<br>K562-01<br>h38      | ENCODE |    | 2.00e-308 | 5 |    | 2.00e-308 | 6 |    | 2.00e-308 | 7 |    | single<br>stranded |
| <b>RBPF0X2</b><br>eCLIP<br>HepG2-02<br>h38 | ENCODE |   | 1.1E-175  | 6 |   | 4.5E-163  | 5 |   | 1.3E-158  | 7 |   |                    |
| <b>RBPF0X2</b><br>eCLIP<br>K562-02<br>h38  | ENCODE |  | 7.5E-101  | 5 |  | 3.29E-70  | 6 |  | 2.69E-68  | 7 |  |                    |
| <b>SLBP</b><br>eCLIP<br>K562-01<br>h38     | ENCODE |  | 1.6E-39   | 5 |  | 2.11E-36  | 6 |  | 2.38E-33  | 7 | <b>AAAggcucuUUUC</b><br>from<br>SOLVED<br>STRUCTURE                                   | stem-loop          |
| <b>SRSF1</b><br>eCLIP<br>HepG2-02<br>h38   | ENCODE |  | 2E-88     | 6 |  | 8.43E-84  | 5 |  | 9.08E-80  | 4 |  | single<br>stranded |

|                                             |        |                                                                                     |           |   |                                                                                     |           |   |                                                                                       |           |   |                                                                                       |                    |
|---------------------------------------------|--------|-------------------------------------------------------------------------------------|-----------|---|-------------------------------------------------------------------------------------|-----------|---|---------------------------------------------------------------------------------------|-----------|---|---------------------------------------------------------------------------------------|--------------------|
| <b>SRSF1</b><br>eCLIP<br>K562-02<br>h38     | ENCODE |    | 9.9E-137  | 4 |    | 7.6E-117  | 5 |    | 1.5E-102  | 6 |    | single<br>stranded |
| <b>SRSF1</b><br>HITSCLIP<br>MEF<br>mm9      | doRiNa |    | 5.16E-32  | 4 |    | 8.13E-27  | 5 |    | 1.85E-16  | 6 |    | single<br>stranded |
| <b>SRSF2</b><br>HITSCLIP<br>MEF<br>mm9      | doRiNa |    | 1.29E-36  | 4 |    | 7.78E-27  | 5 |    | 2.62E-26  | 6 |    |                    |
| <b>SRSF7</b><br>eCLIP<br>K562-02<br>h38     | ENCODE |    | 1.1E-165  | 5 |    | 2.1E-155  | 6 |    | 3.3E-150  | 7 |    |                    |
| <b>SRSF9</b><br>eCLIP<br>HepG2-02<br>h38    | ENCODE |    | 1.1E-107  | 6 |    | 2.1E-107  | 5 |    | 4.8E-107  | 7 |    |                    |
| <b>TAF15</b><br>PARCLIP<br>HEK293-01<br>h19 | CLIPdb |    | 9.51E-12  | 7 |    | 2.68E-09  | 6 |    | 7.6E-08   | 5 |                                                                                       |                    |
| <b>TAF15</b><br>eCLIP<br>HepG2-02<br>h38    | ENCODE |   | 3E-179    | 5 |   | 1.4E-175  | 6 |   | 2.1E-168  | 7 |                                                                                       |                    |
| <b>TARDBP</b><br>iCLIP<br>SH-SY5Y<br>h19    | doRiNa |  | 1.8E-301  | 7 |  | 4.6E-276  | 5 |  | 6.9E-271  | 6 |  |                    |
| <b>TARDBP</b><br>eCLIP<br>K562-01<br>h38    | ENCODE |  | 2.00e-308 | 5 |  | 2.00e-308 | 6 |  | 2.00e-308 | 7 |  | NMR                |
| <b>TIA1</b><br>iCLIP<br>HeLa<br>h19         | doRiNa |  | 6.9E-21   | 7 |  | 3.64E-15  | 6 |  | 3.67E-12  | 5 |  |                    |

|                                          |        |                                                                                   |          |   |                                                                                    |          |   |                                                                                     |          |   |                                                                                     |
|------------------------------------------|--------|-----------------------------------------------------------------------------------|----------|---|------------------------------------------------------------------------------------|----------|---|-------------------------------------------------------------------------------------|----------|---|-------------------------------------------------------------------------------------|
| <b>TIA1</b><br>eCLIP<br>HepG2-01<br>h38  | ENCODE |  | 7.8E-194 | 5 |  | 2.3E-106 | 7 |  | 1.3E-105 | 6 |  |
| <b>TRA2A</b><br>eCLIP<br>K562<br>h38     | GEO    |  | 7E-220   | 6 |  | 2.7E-215 | 5 |  | 1.7E-213 | 7 |  |
| <b>U2AF2</b><br>eCLIP<br>HepG2-01<br>h38 | ENCODE |  | 2.5E-110 | 5 |  | 7.03E-98 | 6 |  | 2.11E-66 | 4 |  |
| <b>U2AF2</b><br>eCLIP<br>K562-02<br>h38  | ENCODE |  | 1.31E-55 | 4 |  | 8.98E-54 | 5 |  | 1.05E-53 | 6 |  |

\* *In-vivo motifs were extracted from CISBP-RNA <http://cisbp-rna.cabr.utoronto.ca/> or from AtTRACT <http://attract.cnic.es>.*

\*\* *Structure information was extracted from RNAcompete-S (Cook et al., 2017)*

Supplementary Table S2

| RBP+source                                | SMARTIV *                                                                           | RBPMotif                                                                            |                                                                                       | GraphProt                                                                             |                                                                                       |
|-------------------------------------------|-------------------------------------------------------------------------------------|-------------------------------------------------------------------------------------|---------------------------------------------------------------------------------------|---------------------------------------------------------------------------------------|---------------------------------------------------------------------------------------|
|                                           | Seq+Struct                                                                          | Seq                                                                                 | Struct                                                                                | Seq                                                                                   | Struct                                                                                |
| <b>EIF4G2</b><br>eCLIP<br>K562_01<br>hg38 |    |    |    |    |    |
| <b>EWSR1</b><br>eCLIP<br>K562_01<br>hg38  |    |   |    |    |    |
| <b>FUBP3</b><br>eCLIP<br>HepG2-02<br>h38  |    |    |    |    |    |
| <b>hnRNPA1</b><br>eCLIP<br>K562-02<br>h38 |   |   |   |   |   |
| <b>hnRNPM</b><br>eCLIP<br>HepG2-01<br>h38 |  |  |  |  |  |
| <b>KHSRP</b><br>eCLIP<br>K562-01<br>h38   |  |  |  |  |  |



|                                          |  |  |  |  |  |
|------------------------------------------|--|--|--|--|--|
| <b>PTB1</b><br>eCLIP<br>K562-02<br>h38   |  |  |  |  |  |
| <b>PUM2</b><br>PARCLIP<br>HEK293<br>h19  |  |  |  |  |  |
| <b>QKI</b><br>PARCLIP<br>HEK293<br>h19   |  |  |  |  |  |
| <b>RBFOX</b><br>eCLIP<br>HepG2-02<br>h38 |  |  |  |  |  |
| <b>SRSF1</b><br>eCLIP<br>HepG2-01<br>h38 |  |  |  |  |  |
| <b>SRSF7</b><br>eCLIP<br>K562-02<br>h38  |  |  |  |  |  |
| <b>TAF15</b><br>eCLIP<br>HepG2-02<br>h38 |  |  |  |  |  |
| <b>TARDB</b><br>eCLIP<br>K562-01<br>h38  |  |  |  |  |  |



|                                          |                                                                                   |                                                                                   |                                                                                     |                                                                                     |                                                                                     |
|------------------------------------------|-----------------------------------------------------------------------------------|-----------------------------------------------------------------------------------|-------------------------------------------------------------------------------------|-------------------------------------------------------------------------------------|-------------------------------------------------------------------------------------|
| <b>TIA1</b><br>eCLIP<br>K562-02<br>h38   |  |  |  |  |  |
| <b>U2AF2</b><br>eCLIP<br>HepG2-02<br>h38 |  |  |  |  |  |

\* For comparison SMARTIV was run on a 1000 sequence on the top of the list and 1000 on the bottom

Supplementary Table S3

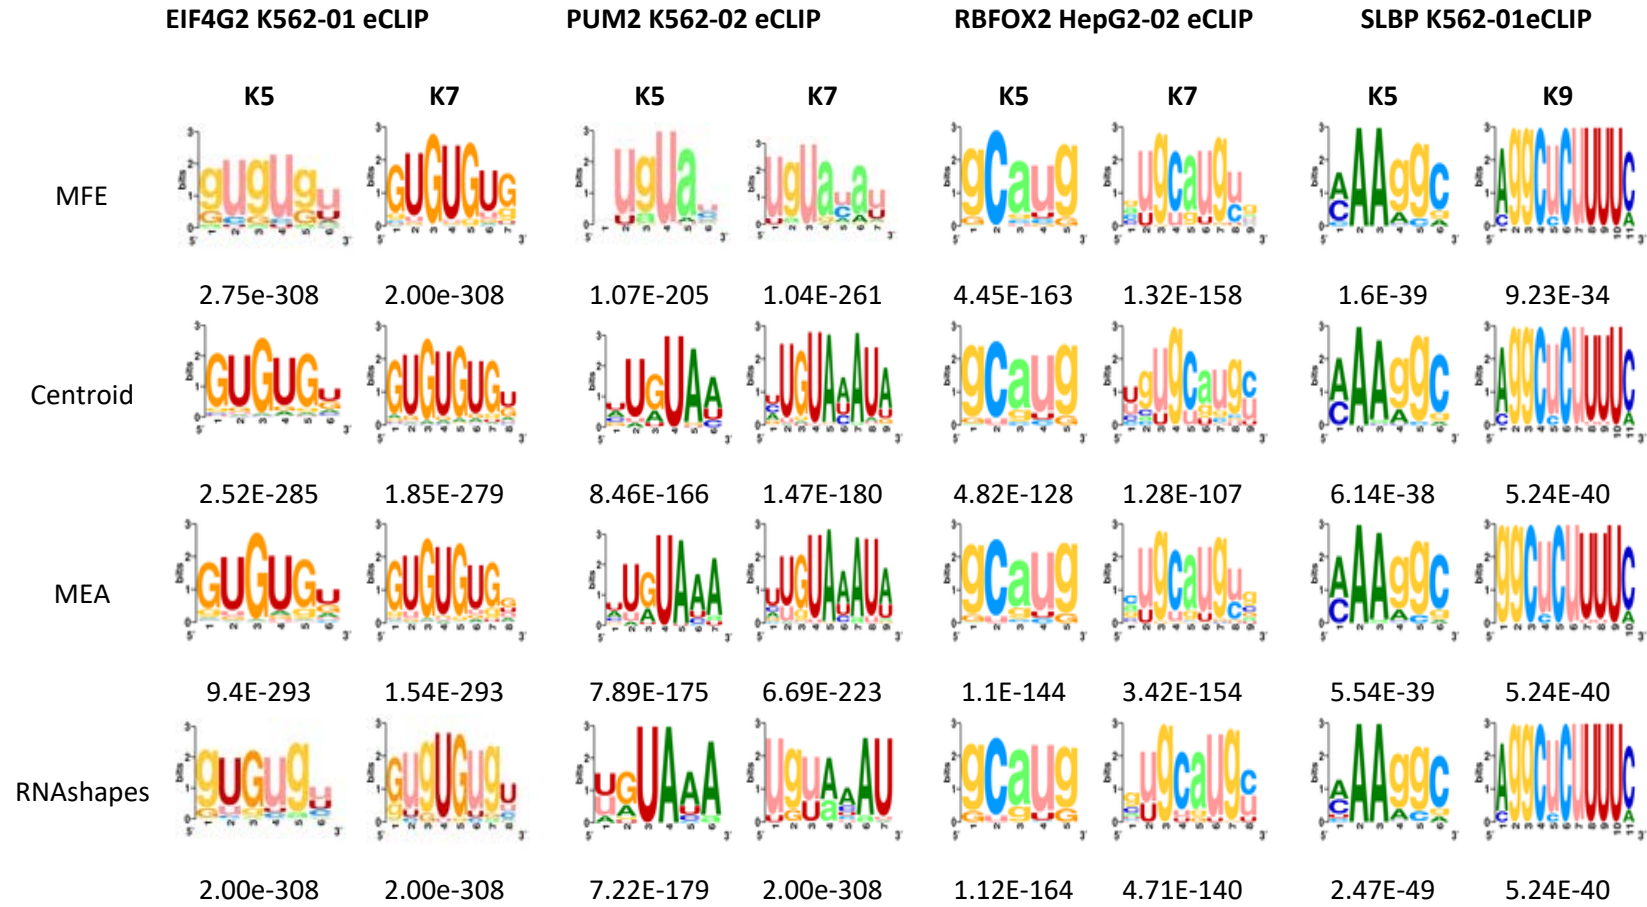

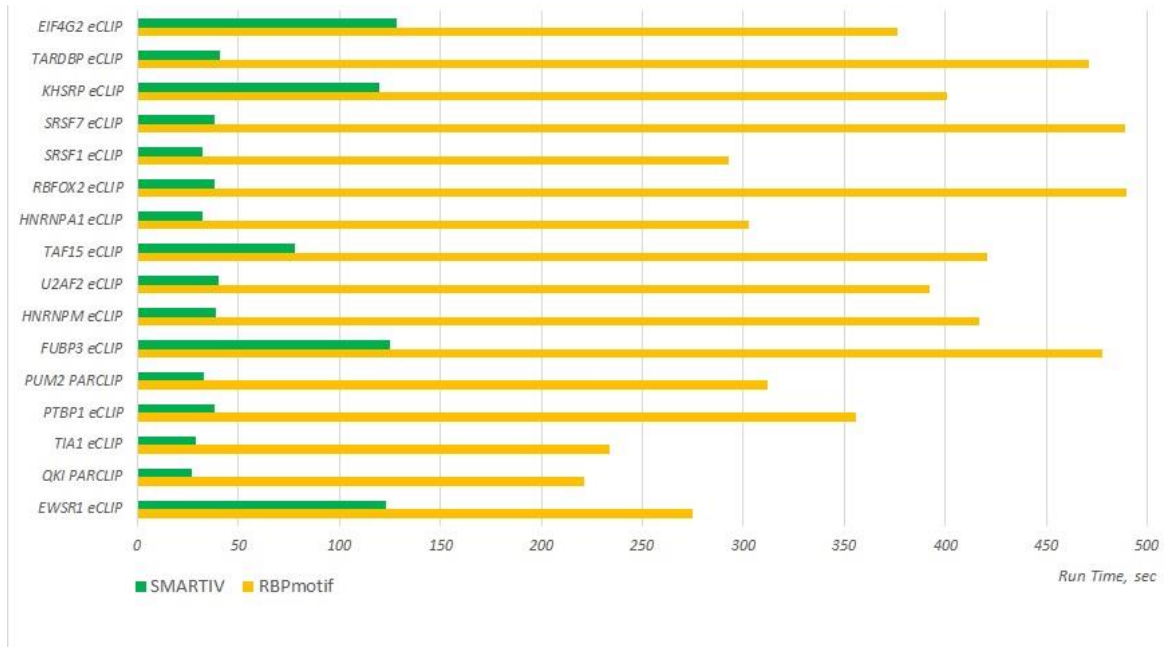

### Supplementary Figure S1: SMARTIV vs RBPmotif runtimes

SMARTIV and RBPmotifs were tested on 16 different dataset (as detailed in Supplementary Table S2) using default parameters. For comparison with RBPmotifs, we run both SMARTIV and RBPmotifs on 2000 sequences per each dataset (top 1000 and bottom 1000 sequences extracted from the ranked sequence list). As shown SMARTIV run time is between 30 second to 3 minutes, depending on the total sequence length and the GC content of the sequences. RBPmotif runtime was usually 5 to 10 fold slower.
